# Supplementary material for: Chemical magnetism – surface force to move motors
Source: Royal Society of Chemistry journal article supplement (doi:10.1039/d4cp02537g), 2024-01-01
Supplement: d4cp02537g1.pdf [file d4cp02537g1.pdf]

Electronic supplementary information (ESI) for PCCP.

## **Supporting Information**

### **Chemical magnetism – surface force to move motors**

*Boris Kichatov\**, *Alexey Korshunov*, *Vladimir Sudakov*,

Semenov Federal Research Central for Chemical Physics, Moscow, Russia

\*Correspondence to: [b9682563@yandex.ru](mailto:b9682563@yandex.ru)

## 1. Supporting Videos

**Video S1:** Movement of paramagnetic nanoparticles  $Fe_3O_4$  in the magnetic field of CM ( $Cu - Zn, CoSO_4$ ). The video is accelerated by a factor of 9  $\times$ .

**Video S2:** Movement of paramagnetic nanoparticles  $Fe_3O_4$  in the magnetic field of CM ( $Cu - Al, CuSO_4$ ). The video is accelerated by a factor of 8  $\times$ .

**Video S3:** Movement of swimmer  $Fe - Ni$  in a non-uniform magnetic field on a copper sulfate solution surface. The video in real time.

**Video S4:** Movement of swimmer  $Fe - Ni$  in a non-uniform magnetic field on a copper sulfate solution surface when the swimmer is turned by  $180^\circ$ . The video is accelerated by a factor of 2  $\times$ .

**Video S5:** Movement of swimmer  $Fe - Ni$  in a non-uniform magnetic field on a copper sulfate solution surface when changing the polarity of the coil. The video in real time.

**Video S6:** Movement of swimmer  $Fe - Ni$  in a non-uniform magnetic field on a copper sulfate solution surface when changing the polarity of the coil and turning the swimmer by  $180^\circ$ . The video is accelerated by a factor of 2  $\times$ .

## 2. Supporting figure

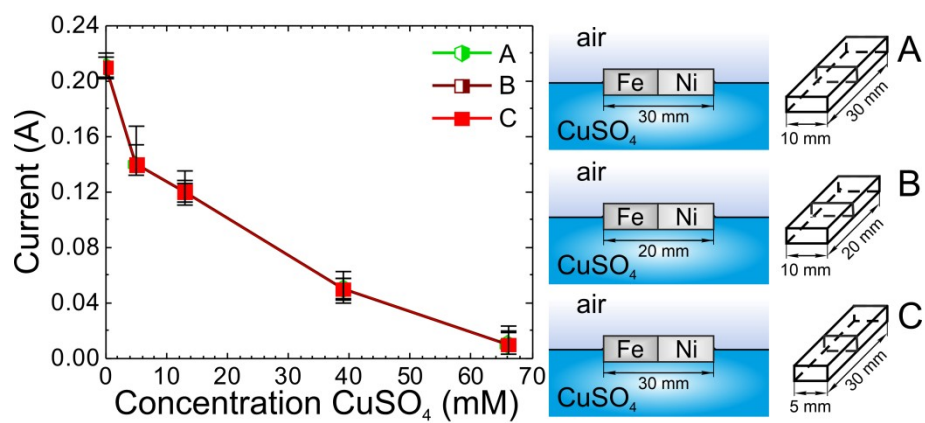

**Fig. S1.** Dependence of the minimum current through the coil, corresponding to the start of motor movement, on the geometric dimensions of the CM (22 °C, copper sulfate, *Fe - Ni*, coil №1).
